# Supplementary material
Source: MDPI journal article supplement (https://www.mdpi.com/2079-9276/12/2/25)
Supplement: s1 [file s1]

Supplementary Material File S1. Survey of tourist preferences

ASSESSMENT OF TOURISTS' PREFERENCES DURING THEIR STAY IN THE SUB-TATRA REGION AND THE TATRA MOUNTAINS

This survey is used to assess the preferences of tourists during their stay in the Sub-Tatra Region and in the Tatra Mountains. The answers will be analyzed and used in scientific work.  
Please fill out the questionnaire carefully.

1. How often do you come to Sub-Tatra Region, Tatra Mountains and the surrounding area?

- |                                                              |                              |
|--------------------------------------------------------------|------------------------------|
| A. Several times a year for long weekends, summer and winter | C. Once a year               |
| B. Twice a year (once in summer, once in winter)             | D. Less than once a year     |
|                                                              | E. I don't come to this area |

2. How long is your stay in Sub-Tatra Region?

- |                      |             |
|----------------------|-------------|
| A. One week and more | C. 1-3 days |
| B. 3-5 days          | D. One day  |

3. What is the main reason for coming to the Sub-Tatra Region and Tatra Mountains ? (you can select more than 1 answer)

- |                           |                                |
|---------------------------|--------------------------------|
| A. Leisure and Recreation | F. Visiting friends and family |
| B. Mountain trips         | G. Skiing/Snowboarding         |
| C. Mountaineering         | H. Skitouring                  |
| D. Gastronomy             | I. Thermal aquaparks           |
| E. Culture and folklore   | J. Other.....                  |

4. Where do you stay during your trip to Sub-Tatra Region?

- |                                           |                                                |
|-------------------------------------------|------------------------------------------------|
| A. in Zakopane                            | F. in the surrounding villages in Liptov       |
| B. in Nowy Targ                           | G. in mountain shelters in the Tatra Mountains |
| C. in the surrounding villages in Podhale | H. in Demänovska Dolina/Jasna                  |
| D. in the surrounding villages in Orava   | I. in other places.....                        |
| E. in the surrounding villages in Spiš    |                                                |

5. During your stay in Sub-Tatra Region, which places do you usually choose for tourism and recreation?

- |                         |                         |
|-------------------------|-------------------------|
| A. Tatras in general    | H. Malá Fatra Mts.      |
| B. High Tatras          | I. Gorce Mts.           |
| C. Western Tatras       | J. Spišská Magura Ridge |
| C. Belianske Tatry Mts. | K. Oravská Magura Ridge |
| D. Low Tatras           | L. thermal aquaparks    |
| E. Slovenský Raj Ridge  | M. Krupówki Street      |
| F. Pieniny Mts.         | O. Other:.....          |
| G. Veľká Fatra Mts.     |                         |

6. Do you go on trips to Slovakia or Poland during your stay in Sub-Tatra Region?

- A. YES  
B. NO

If you answered yes to the above question, go to question 7, if not, go to question 8.

7. What is the main purpose of your trips to Slovakia or Poland?

.....

8. Assess how important it is for you to spend your free time “in the bosom of nature”, especially among attractions related to abiotic nature.

|                     |   |   |   |   |   |  |                                 |
|---------------------|---|---|---|---|---|--|---------------------------------|
| I am not interested |   |   |   |   |   |  | I spend all my free time in the |
| in such attractions | 1 | 2 | 3 | 4 | 5 |  | bosom of nature                 |

9. Which of the following geotourism attractions would you most like to visit? (you can choose more than one answer)

- |                     |                                           |
|---------------------|-------------------------------------------|
| A. a cave           | I. river gorge                            |
| B. geothermal pools | J. river valley                           |
| C. mineral spring   | K. rock outcrop with fossils              |
| D. peatbog          | L lake                                    |
| E. castle ruins     | M waterfall                               |
| F. viewpoint        | N. all                                    |
| G. landslide        | O. I'm not interested in such attractions |
| H. quarry           |                                           |

10. What are your preferences as a tourist:

10.1. I will go to the cave:

- A. Opened, illuminated, accompanied by a guide
- B. Open but unlit and requiring additional equipment and preparation for exploration
- C. I am not interested in this type of geoattraction

10.2. I would like to see the springs of mineral or thermal waters, with the educational panels informing about their specificity:

- A. Where I will be able to drink water and/or take a bath
- B. I will not be able to take advantage of additional attractions
- C. I am not interested in this type of geoattraction

10.3. I will go for a walk along the educational trail in the peatbog:

- A. which is hardened, with platforms and viewpoints
- B. which is only marked out and described in tourist guides and media
- C. I am not interested in this type of geoattraction

10.4. I will go to a medieval castle if:

- A. I will be able to use the services of a local guide
- B. Regardless of the possibility of using guide services
- C. I am not interested in this type of geoattraction

10.5. I will want to see a unique panorama from a high peak, on which:

- A. I will take the cable car
- B. I will go on foot
- C. I am not interested in this type of geoattraction

10.6. I will go to the landslide:

- A. to see what it looks like
- B. only when I can use other additional attractions in its vicinity (bicycle path, snow park)
- C. I am not interested in this type of geoattraction

10.7. I will go to the river (stream) to get to know interesting places in its riverbed and:

- A. to rest by the water
- B. to additionally take advantage of various attractions, i.e. gold panning, kayaking, other
- C. I am not interested in this type of geoattraction

10.8. I will go to a closed quarry:

- A. to see interesting rocks and be able to collect them yourself
- B. when there will be an amphitheater in it and when I be able to listen to concerts there
- C. I am not interested in this type of geoattraction

10.9. I will go to the lake:

- A. in which I will be able to swim, take advantage of various water attractions (active recreation)
- B. over which I can only sit and rest, and any additional attractions will be forbidden (passive rest)
- C. I am not interested in this type of geoattraction

#### SPECIFICATION:

11. Age:

- |                    |                    |
|--------------------|--------------------|
| A. <15 years old   | D. 27-35 years     |
| B. 15-20 years old | E. 36-50 years old |
| C. 21-26 years old | F. 50 < years old  |

12. Gender:

- |           |         |
|-----------|---------|
| A. female | B. male |
|-----------|---------|

13. Education level

- |                        |                     |
|------------------------|---------------------|
| A. primary education   | C. higher education |
| B. secondary education |                     |

14. Do you have a degree in natural sciences or are you interested in natural sciences? (geography, biology, geology, environmental protection, etc.)

- |        |       |
|--------|-------|
| A. YES | B. NO |
|--------|-------|

15. Occupation/Field of study:.....

16. The name of the city/town/village where you come from .....

17. Who do you travel with most often?

- |                         |                            |
|-------------------------|----------------------------|
| A. alone                | D. with a group of friends |
| B. with family          | E. Other:....              |
| C. with the best friend |                            |

THANK YOU FOR COMPLETING THE SURVEY
