# Supplementary material
Source: MDPI journal article supplement (https://www.mdpi.com/2079-9276/12/2/25)
Supplement: s1 [file s1]

Archive with 1 entries (1 files):
- resources-2094819-supplementary.pdf
